# Supplementary material
Source: publisher figshare collection journal article supplement (https://acs.figshare.com/ndownloader/files/24026313)
Supplement: Supplementary file 1 [file 24026313]

**Supporting Information**

**Revisiting  $\text{LiCoO}_2$  Using a State-of-the-Art *In***  
***Operando* Technique**

Kazuhiko Mukai,\* Takeshi Uyama, and Takamasa Nonaka

*Toyota Central Research and Development Laboratories, Inc., 41-1 Yokomichi, Nagakute,  
Aichi 480-1192, Japan*

\*E-mail: e1089@mosk.tytlabs.co.jp

Phone: +81-561-71-7698. Fax: +81-561-63-6119

---

\*To whom correspondence should be addressed

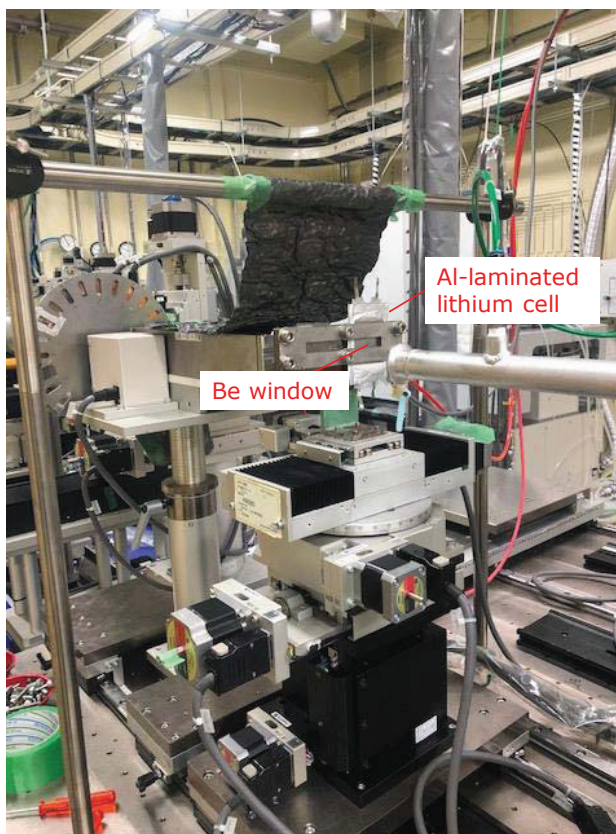

**Figure S1:** Al-laminated lithium cell covered with the Be window for *in operando* XRD/XAS measurements installed at the Toyota beamline (BL33XU) at SPring-8, Japan. Thickness of the Be window was 0.2 mm. The beam size at the sample position was 3.0 mm (height)  $\times$  0.5 mm (width) for both XRD and XAS measurements.

**Table S1:** Structural parameters of the pristine OST-LCO sample ( $x_0 = 1.1$ ) determined by Rietveld analysis

| Atom                                                                                                                                                         | Wyckoff position | Occupancy <sup>a</sup><br>( $g$ ) | $x$ | $y$ | $z$      | $B_{\text{iso}}$<br>( $\text{\AA}^2$ ) |
|--------------------------------------------------------------------------------------------------------------------------------------------------------------|------------------|-----------------------------------|-----|-----|----------|----------------------------------------|
| Li1                                                                                                                                                          | $3b$             | 1.0                               | 0   | 0   | 0.5      | 0.7(1)                                 |
| Li2                                                                                                                                                          | $3a$             | 0.04                              | 0   | 0   | 0        | 0.1(1)                                 |
| Co                                                                                                                                                           | $3a$             | 0.96                              | 0   | 0   | 0        | 0.1(1)                                 |
| O                                                                                                                                                            | $6c$             | 0.98                              | 0   | 0   | 0.261(2) | 0.2(1)                                 |
| Space group: $R\bar{3}m$ , $a_{\text{h}} = 2.8162(1)$ $\text{\AA}$ , and $c_{\text{h}} = 14.0510(1)$ $\text{\AA}$<br>$R_{\text{wp}} = 9.70$ % and $S = 1.01$ |                  |                                   |     |     |          |                                        |

<sup>a</sup>We employed  $\delta = 0.04$  by considering the amount of evaporated Li atoms (0.02) during the synthesis.

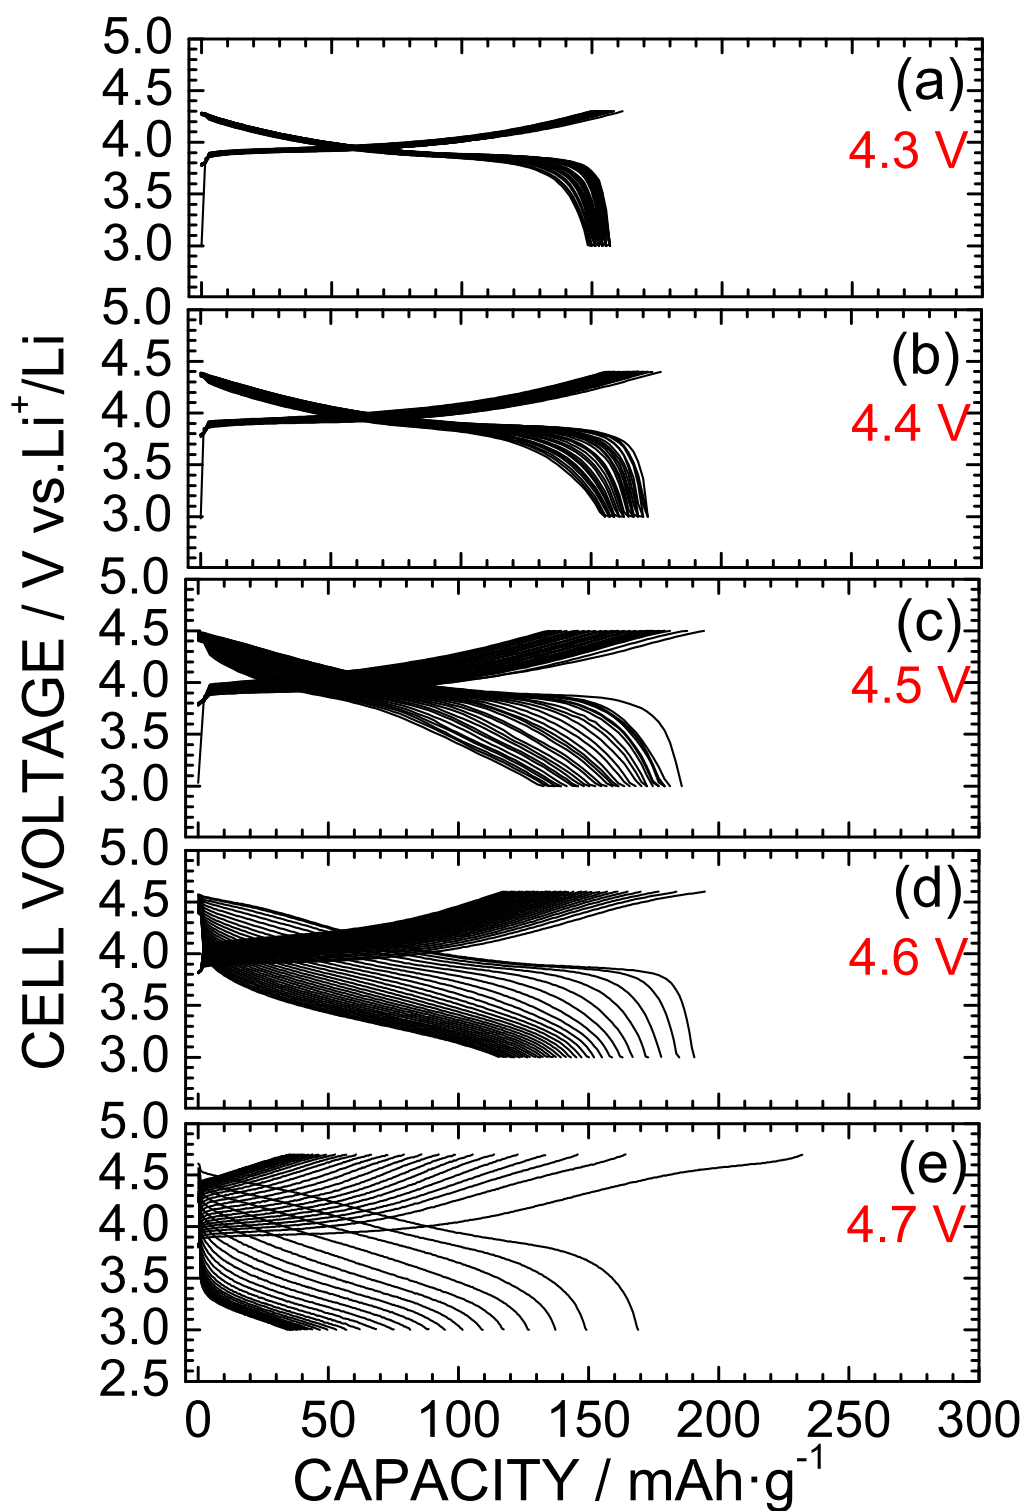

**Figure S2:** Charge and discharge curves of the Li/OST-LCO ( $x_0 = 1.1$ ) cells operated with  $V_{\text{cut-off}} =$  (a) 4.3 V, (b) 4.4 V, (c) 4.5 V, (d) 4.6 V, and (e) 4.7 V. The applied current was 0.3 mA ( $\simeq 0.15 \text{ mA} \cdot \text{cm}^{-2}$ ) and the environmental temperature was 25 °C.

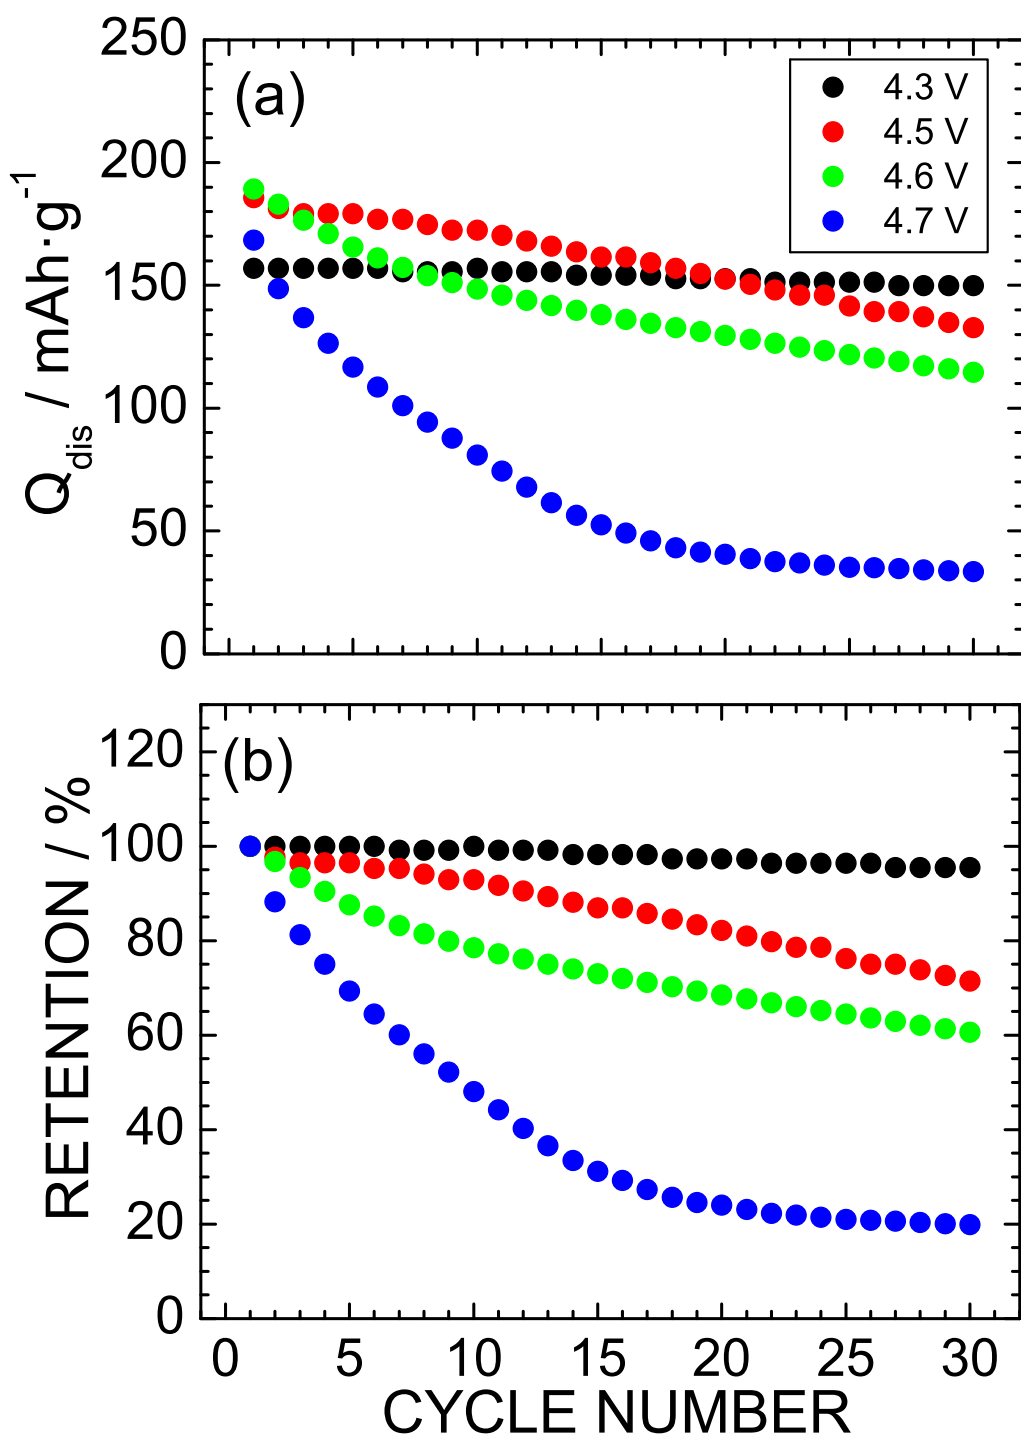

Figure S3: (a)  $Q_{\text{dis}}$  and (b) capacity retention as a function of the number of cycles operated with  $V_{\text{cut-off}} = 4.3, 4.5, 4.6,$  and  $4.7$  V.

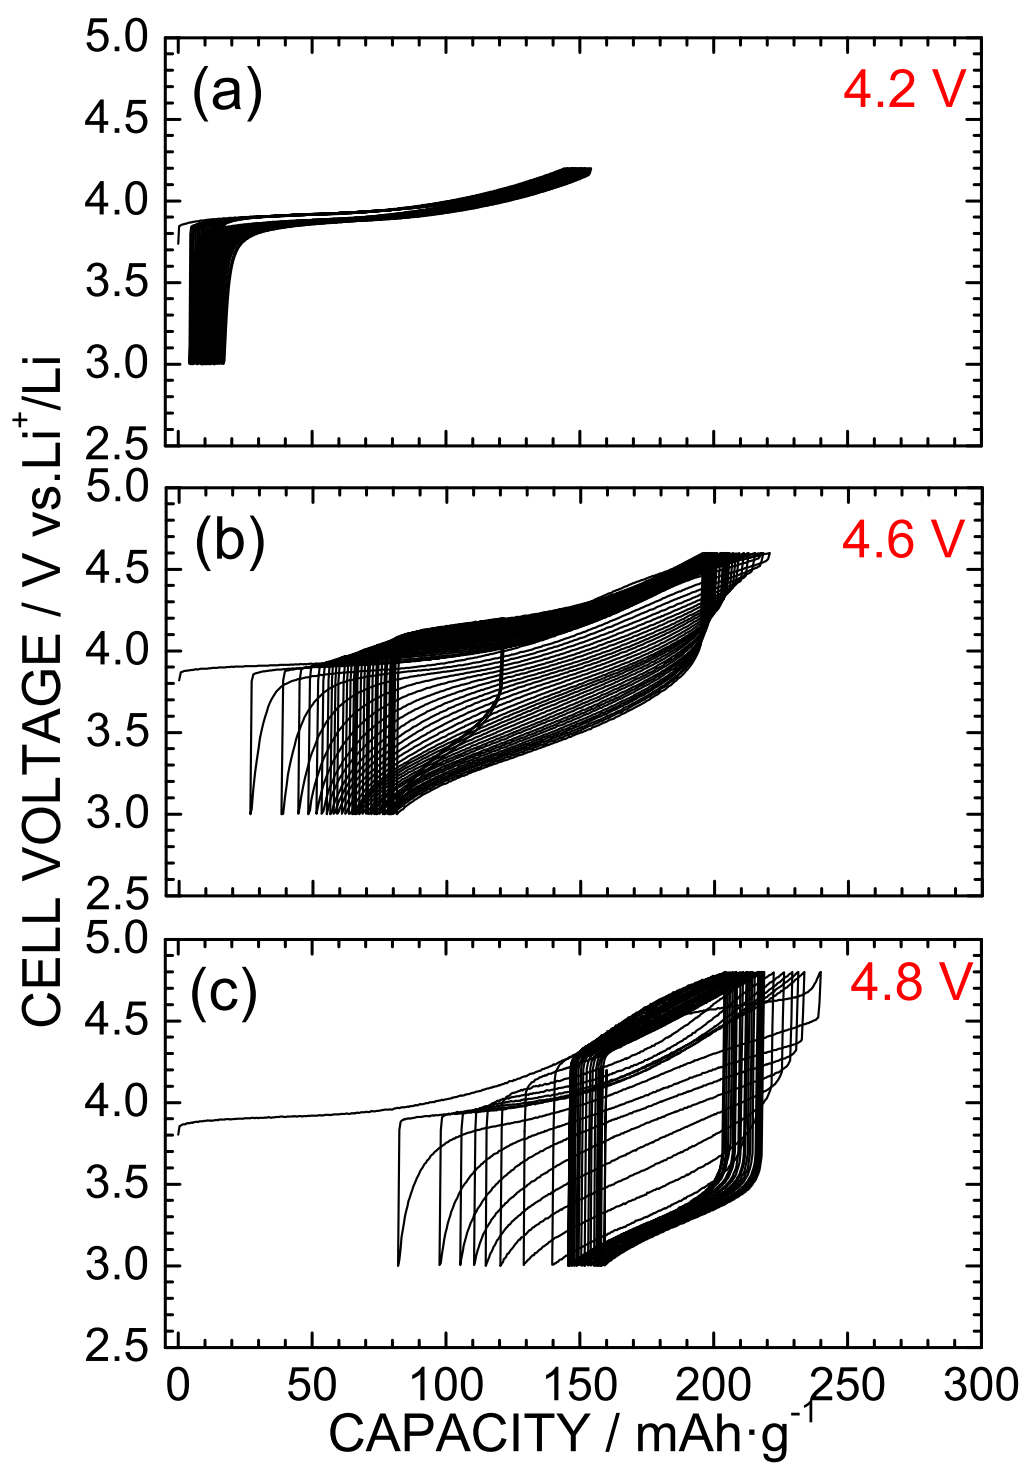

Figure S4: Charge-discharge curves by a single stroke with  $V_{\text{cut-off}} =$  (a) 4.2, 4.6, and 4.8 V.

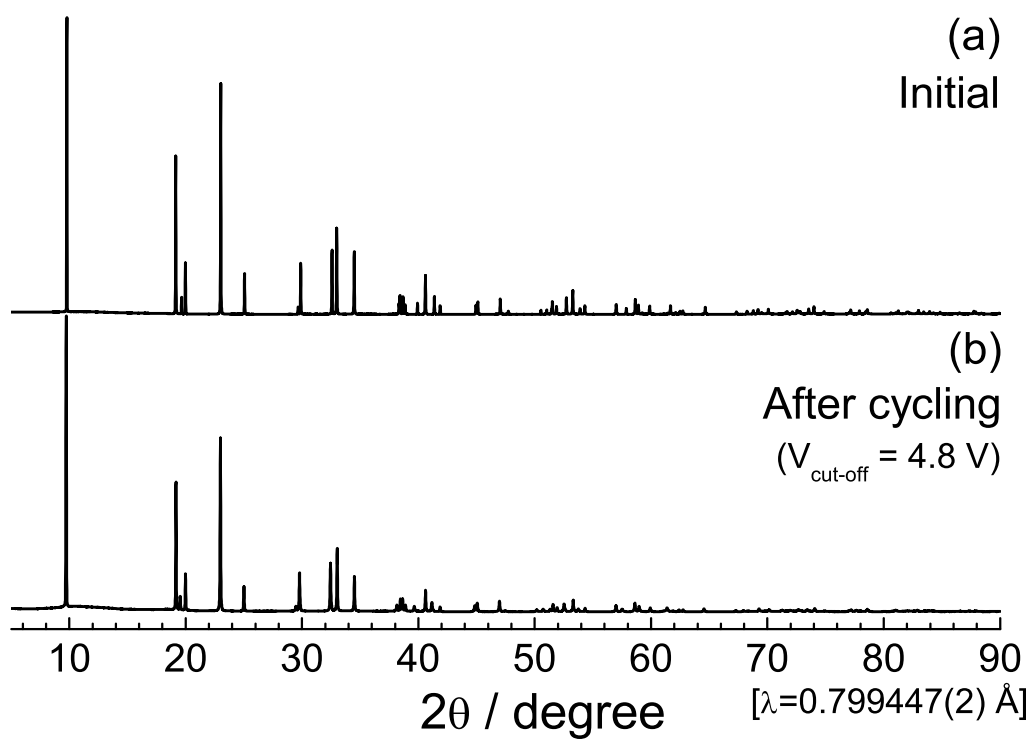

**Figure S5:** XRD patterns of the OST-LCO sample ( $x_0 = 1.1$ ) at the (a) initial and (b) after cycling. The lithium cell was operated at a current of 0.3 mA with  $V_{\text{cut-off}} = 4.8$  V.

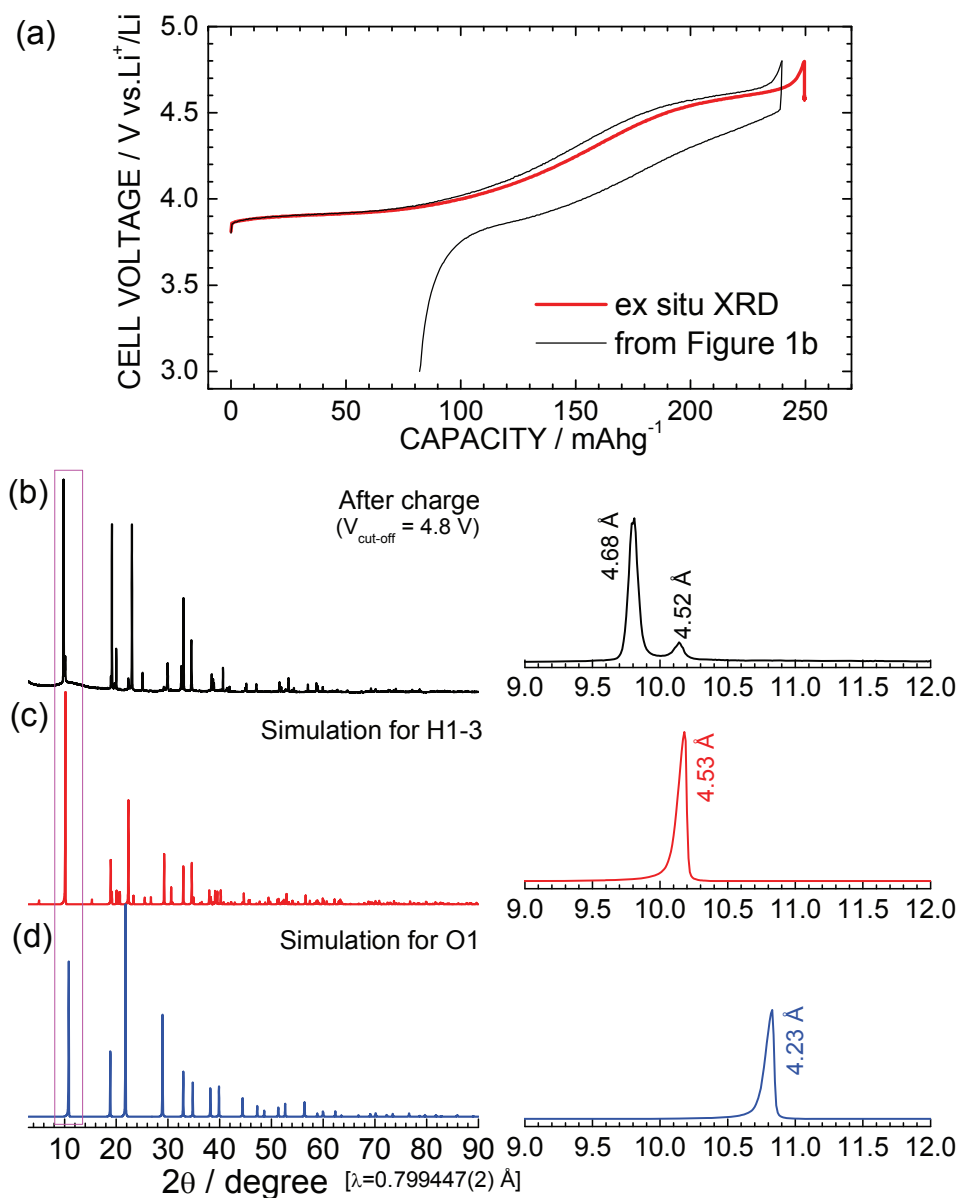

**Figure S6:** (a) Charge curve of the OST-LCO sample ( $x_0 = 1.1$ ) for an *ex situ* XRD measurement. (b) *Ex situ* XRD pattern of the OST-LCO sample in (a) and simulated XRD patterns for the (c) H1-3 and (d) O1 phases. The magnified XRD patterns in the  $2\theta$  range between  $9$  and  $12^\circ$  are shown in the right side.



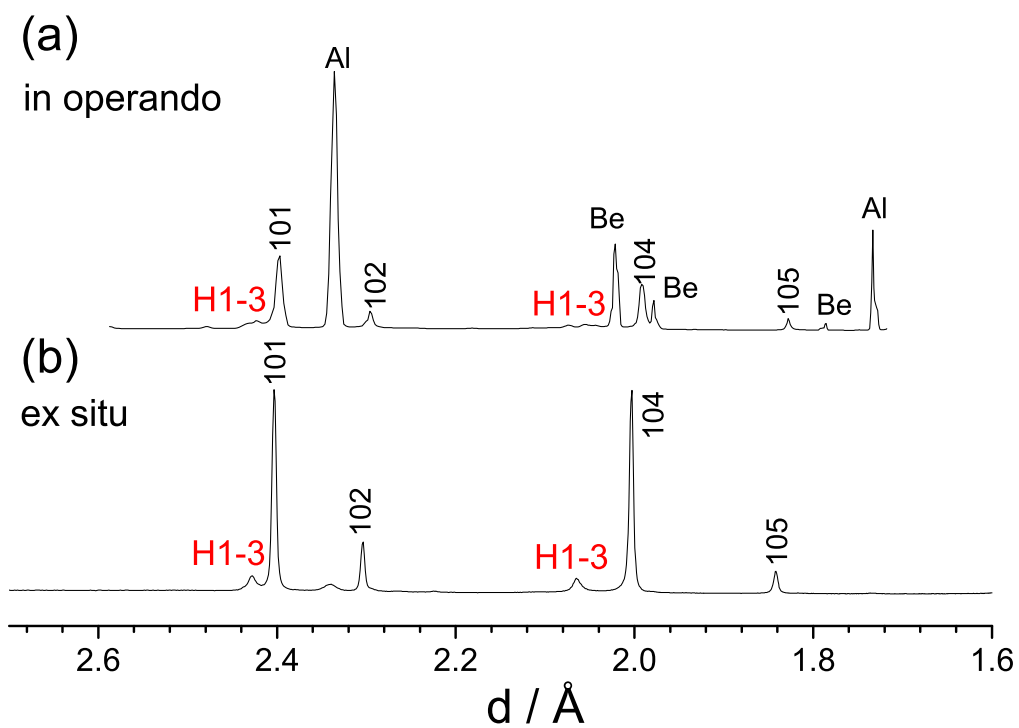

**Figure S7:** (a) *In operando* and (b) *ex situ* XRD patterns at the fully charged state up to 4.8 V, where the diffraction angles were given by  $d$  values.

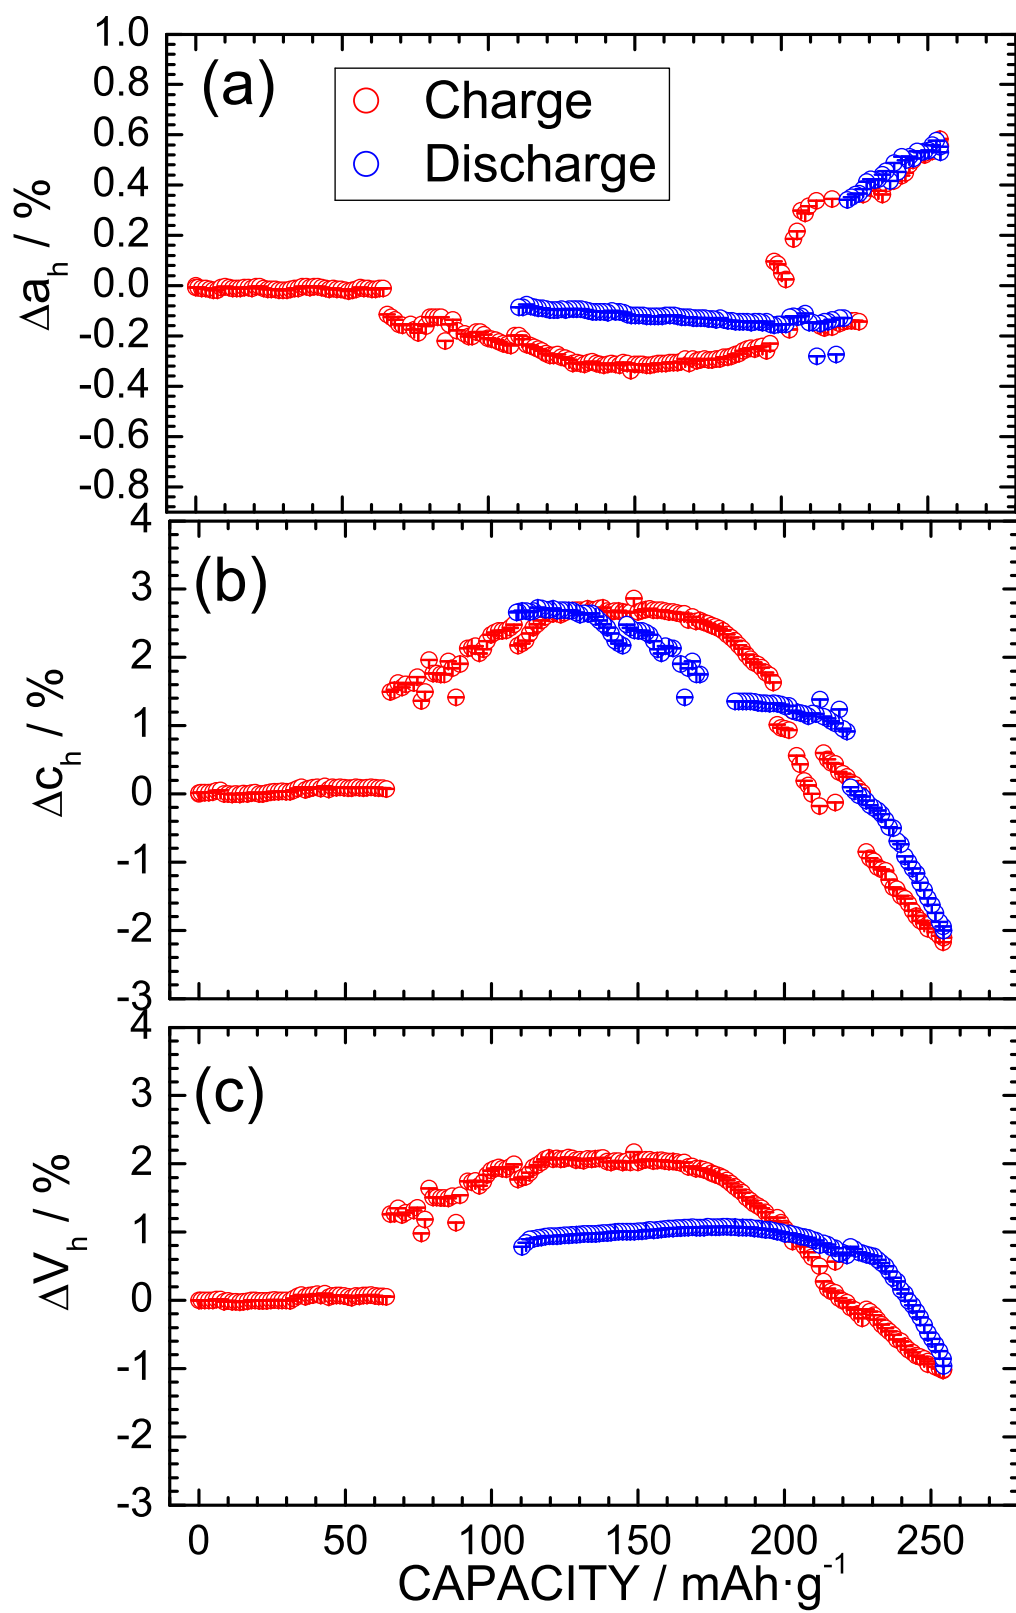

**Figure S8:** Changes in (a)  $\Delta a_h$ , (b)  $\Delta c_h$ , and (c)  $\Delta V_h$  determined by the *in operando* XRD measurements.

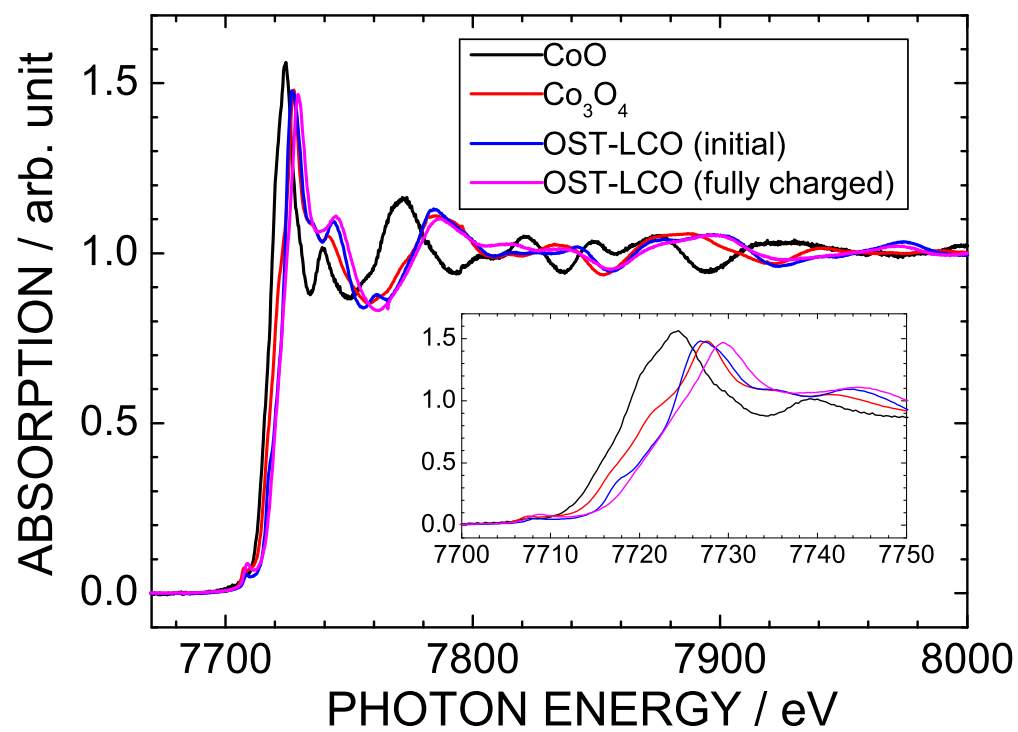

**Figure S9:** XANES spectra of CoO and Co<sub>3</sub>O<sub>4</sub> together with those of OST-LCO ( $x_0 = 1.1$ ) at the initial fully charged states.

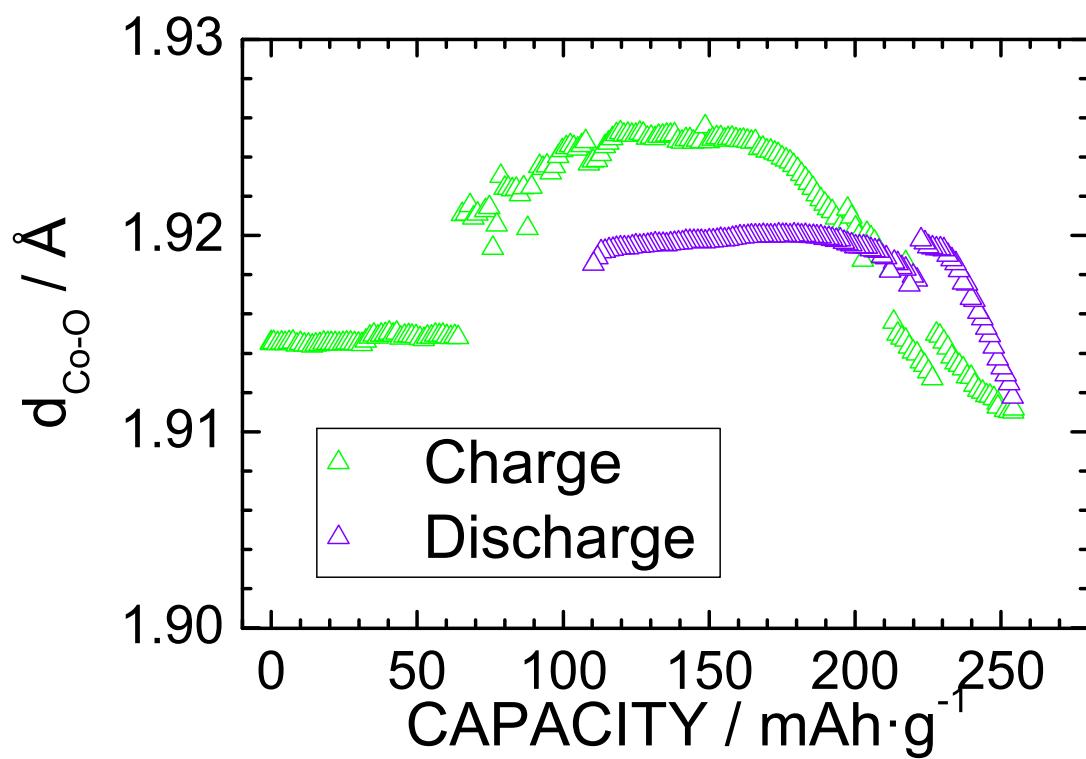

**Figure S10:** Enlarged  $d_{\text{Co-O}}$  obtained by the *in operando* XRD measurements.

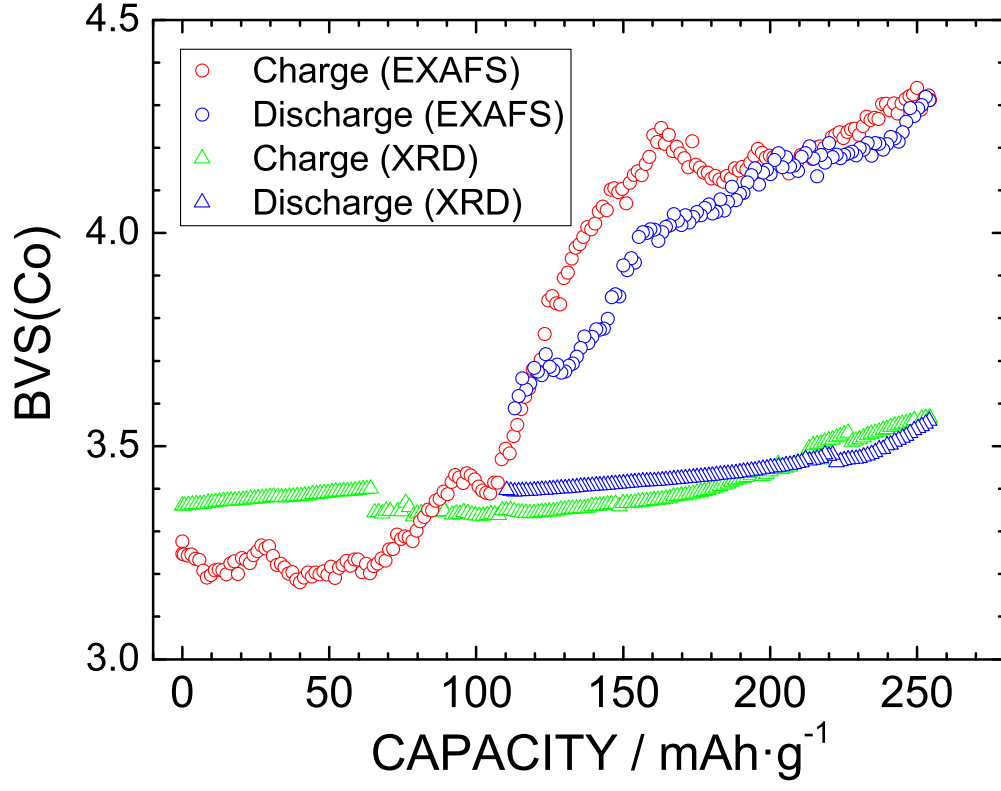

**Figure S11:** BVS(Co) obtained by the XRD and EXAFS studies.

The BVS(Co) value was calculated by following equation:

$$\text{BVS}(\text{Co}) = \sum_i^6 \exp \frac{(r_0 - r_i)}{0.37}, \quad (1)$$

where  $r_i = d_{\text{Co-O}}$ . Furthermore, we employed variable  $r_0$  with  $Q$ , i.e.,  $r_0 = 1.70$  for  $\text{Co}^{3+}$  and  $r_0 = 1.72$  for  $\text{Co}^{4+}$ , to reflect the amount of  $\text{Co}^{3+}$  (or  $\text{Co}^{4+}$ ) ions in OST-LCO.

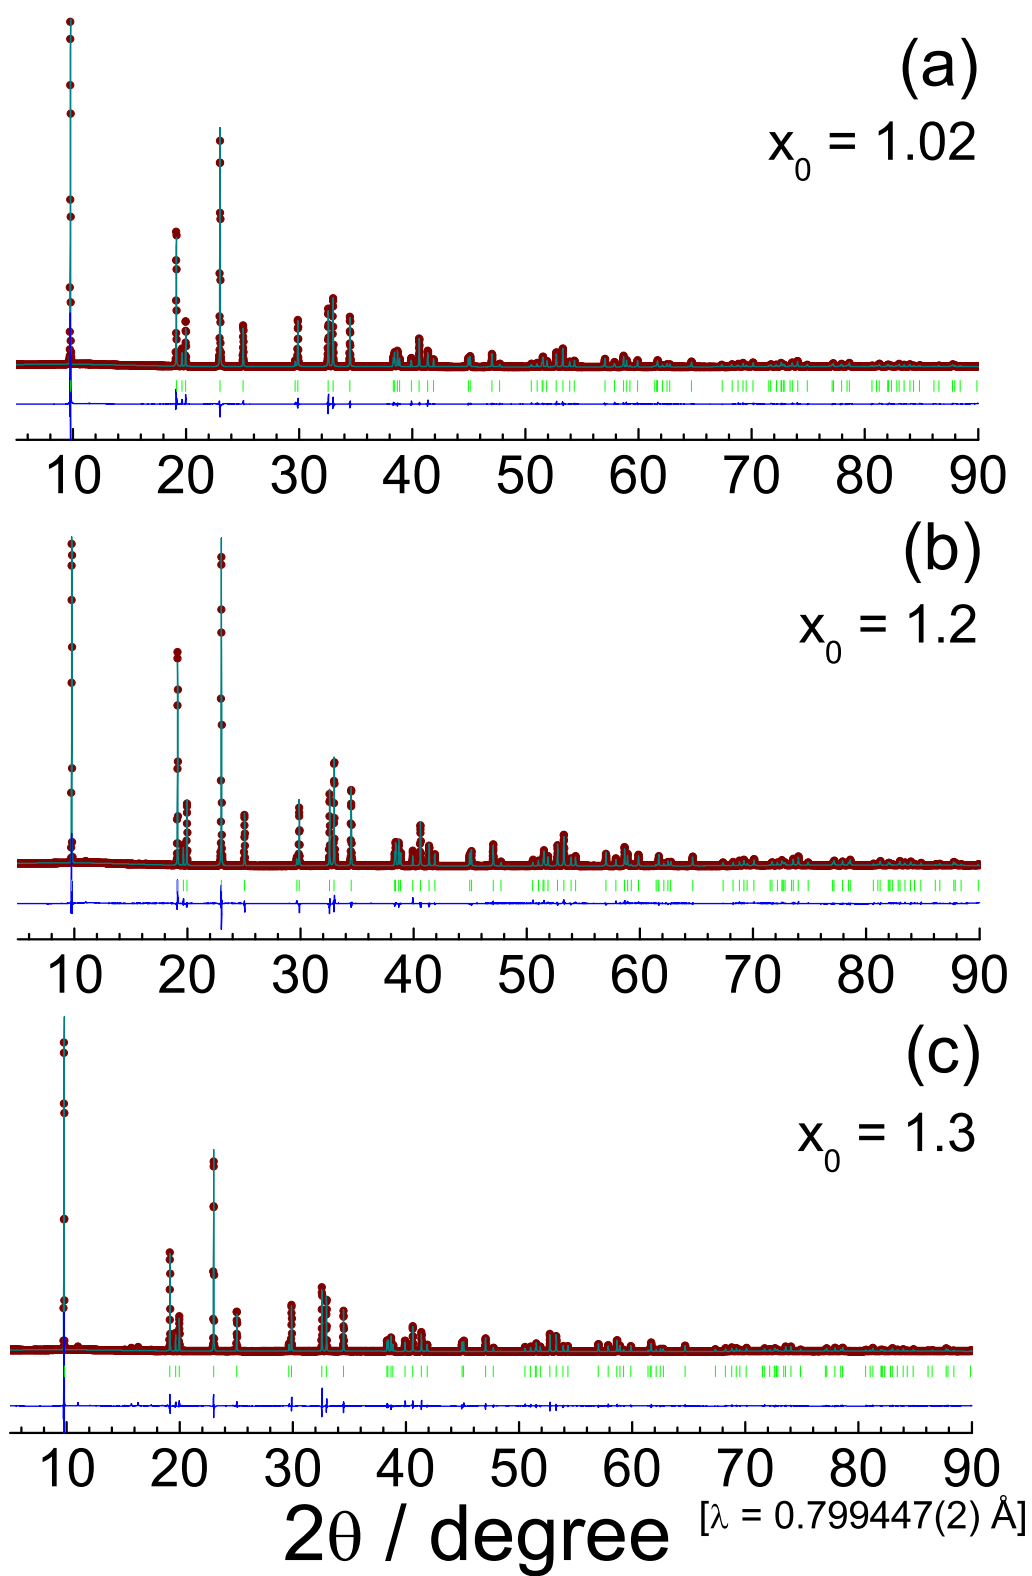

**Figure S12:** Rietveld results of the OST- (or ST-) LCO samples prepared with (a)  $x_0 = 1.02$ , (b)  $x_0 = 1.2$ , and (c)  $x_0 = 1.3$ .

**Table S2:** Structural parameters of OST- (or ST-)LCO samples prepared with  $x_0 = 1.02$ , 1.2, and 1.3

| $x_0$                                                                                                                | Atom | Wyckoff position | Occupancy <sup>a</sup> ( $g$ ) | $x$ | $y$ | $z$      | $B_{\text{iso}}$ ( $\text{\AA}^2$ ) |
|----------------------------------------------------------------------------------------------------------------------|------|------------------|--------------------------------|-----|-----|----------|-------------------------------------|
| 1.02                                                                                                                 | Li1  | $3b$             | 1.0                            | 0   | 0   | 0.5      | 1.2(1)                              |
|                                                                                                                      | Co   | $3a$             | 1.0                            | 0   | 0   | 0        | 1.0(1)                              |
|                                                                                                                      | O    | $6c$             | 1.0                            | 0   | 0   | 0.260(2) | 0.9(1)                              |
| Space group: $R\bar{3}m$ , $a_h = 2.8149(1)$ Å, and $c_h = 14.0532(1)$ Å<br>$R_{\text{wp}} = 11.11$ % and $S = 1.05$ |      |                  |                                |     |     |          |                                     |
| 1.2                                                                                                                  | Li1  | $3b$             | 1.0                            | 0   | 0   | 0.5      | 0.8(2)                              |
|                                                                                                                      | Li2  | $3a$             | 0.08                           | 0   | 0   | 0        | 0.1(2)                              |
|                                                                                                                      | Co   | $3a$             | 0.92                           | 0   | 0   | 0        | 0.1(2)                              |
|                                                                                                                      | O    | $6c$             | 0.96                           | 0   | 0   | 0.262(2) | 0.2(2)                              |
| Space group: $R\bar{3}m$ , $a_h = 2.8162(1)$ Å, and $c_h = 14.0493(1)$ Å<br>$R_{\text{wp}} = 8.77$ % and $S = 0.93$  |      |                  |                                |     |     |          |                                     |
| 1.3                                                                                                                  | Li1  | $3b$             | 1.0                            | 0   | 0   | 0.5      | 1.4(2)                              |
|                                                                                                                      | Li2  | $3a$             | 0.12                           | 0   | 0   | 0        | 0.1(2)                              |
|                                                                                                                      | Co   | $3a$             | 0.88                           | 0   | 0   | 0        | 0.1(2)                              |
|                                                                                                                      | O    | $6c$             | 0.94                           | 0   | 0   | 0.260(2) | 0.4(2)                              |
| Space group: $R\bar{3}m$ , $a_h = 2.8161(1)$ Å, and $c_h = 14.0522(1)$ Å<br>$R_{\text{wp}} = 13.14$ % and $S = 1.21$ |      |                  |                                |     |     |          |                                     |

<sup>a</sup>We employed  $\delta = 0$  for  $x_0 = 1.02$ ,  $\delta = 0.08$  for  $x_0 = 1.2$ , and  $\delta = 0.12$  for  $x_0 = 1.3$ , by considering the amount of evaporated Li atoms (0.02) during the synthesis.

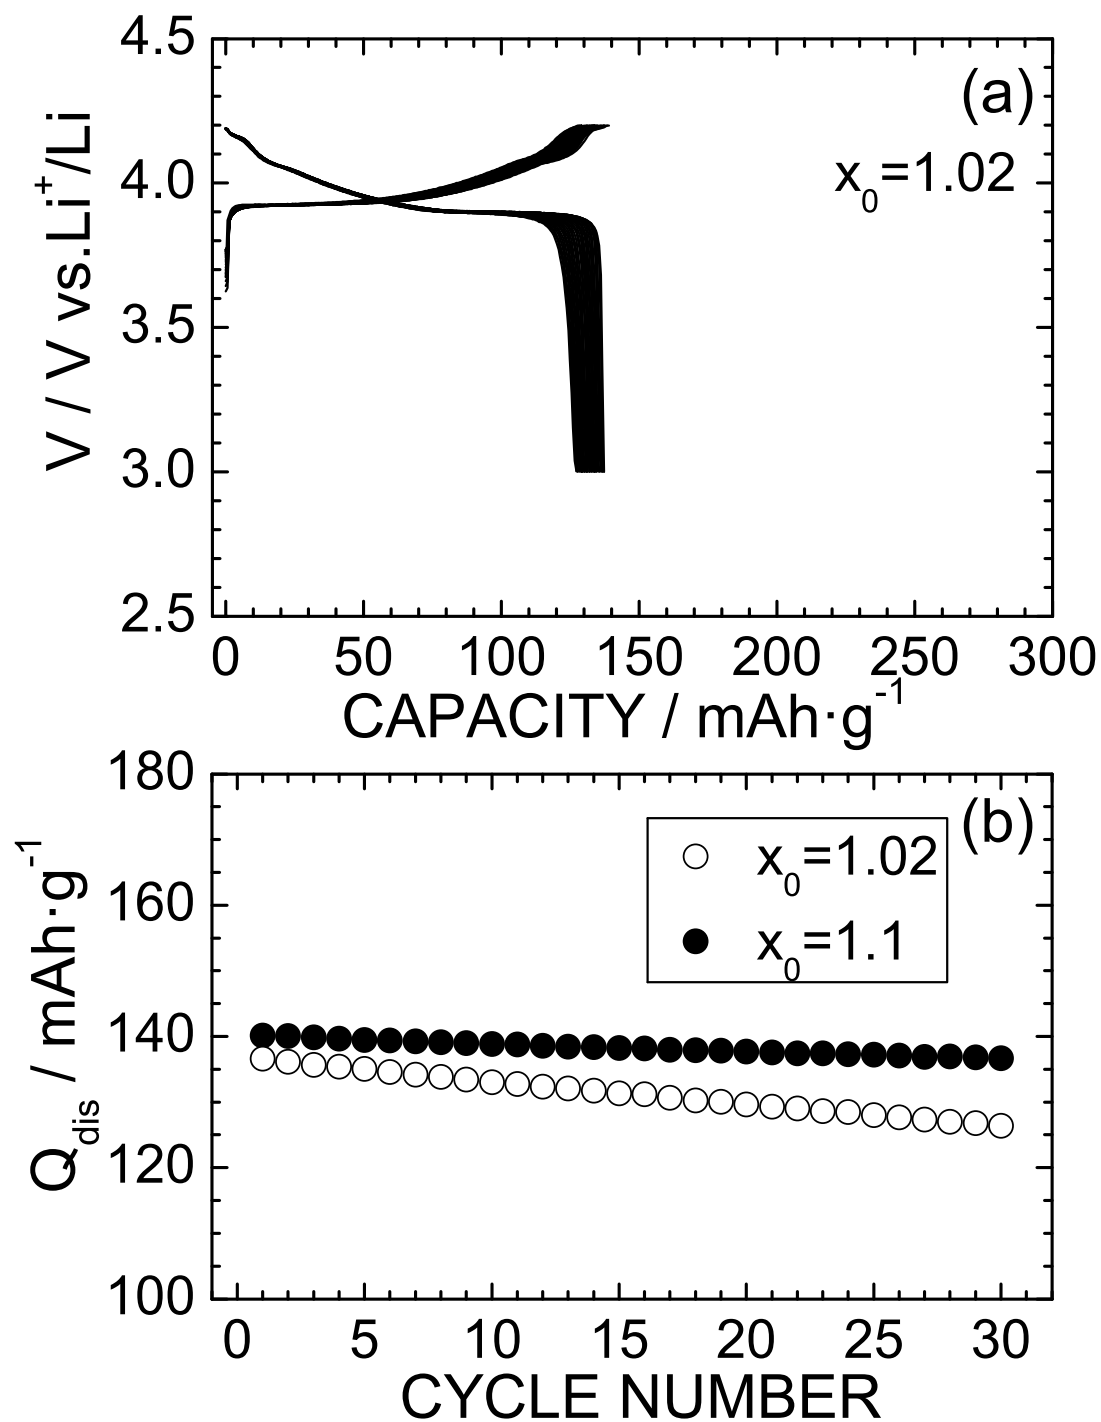

**Figure S13:** (a) Charge-discharge curves of the ST-LCO sample ( $x_0 = 1.02$ ) and (b) comparison of cyclability between ST- and OST-LCO ( $x_0 = 1.1$ ) samples.
